# Supplementary material for: On the need of a time and location dependent estimation of the NDSI threshold value for reducing existing uncertainties in snow cover maps at different scales
Source: Copernicus journal article supplement (doi:10.5194/tc-2017-177), 2017-09-15
Supplement: Supplementary file [file tc-2017-177-AC2-supplement.pdf]

# Answer to the review of S. Cascoïn

## General comments:

**1)** The authors choose not to apply atmospheric correction to the Landsat scenes. Absorption and scattering by the air molecules and aerosols can have an impact on the NDSI, although atmospheric absorbance is typically low in the SWIR and Green wavelengths, which are used to compute the NDSI (especially in high elevation areas). However, this shall be better discussed since the authors justify their study by the fact that the 0.4 NDSI threshold is used for the MODIS snow products ("This is of special interest as MODIS snow cover products are today the most frequently applied satellite snow cover maps"). If the authors referred to NASA's MOD10/MYD10 snow products, the atmospheric correction is applied before computing the NDSI. In addition, the NDSI threshold is not applied anymore in the latest collection 6. More importantly, the lack of atmospheric correction cast doubts on the significance and the transferability to other sites of the "newly developed calibrated quadratic polynomial model which is accounting for seasonal threshold dynamics". The authors should clarify this to avoid confusing readers who are not familiar with satellite imagery processing.

**Answer to 1)** Thank you for this useful comment. You are right that we did not state the atmospheric correction of the MODIS snow cover product (MOD10/MYD10). And it is also true that the recently updated MODIS snow cover product collection does not use the fixed threshold of 0.4 anymore but uses a flag system in combination with a NDSI value of 0 as threshold. However, an own NDSI threshold can be used. Hence, the new algorithm gives more freedom to the users. This will probably lead to the situation that many users that cannot assess the value of the flag system or the best NDSI threshold for their scene might simply use the standard 0.4 threshold value again. In any case, we will add this information in the introduction to clarify the new situation for MODIS snow products to users unexperienced in this field of research as well as that we agree to add the statement to the manuscript that the developed quadratic approach might be only transferable to other high elevation areas at the moment and that further tests and probably an atmospheric correction of the data are needed if an application in lowland areas is planned.

## **Manuscript changes to 1)**

p.2, l.29 to 34: "Accuracies in this range even though for the atmospherically corrected MODIS snow cover product (MOD10/MYD10) make *NDSI* based snow cover products well accepted for global scale applications, but uncertainties have to be expected at the local scale (Härer et al. 2016). Moreover, the snow detection algorithm for the MODIS snow cover product changed in the latest collection 6. The algorithm now uses a NDSI threshold of zero together with a flag system to detect snow cover and users are encouraged to use their own NDSI threshold in the MODIS Snow Products Collection 6 User Guide if a binary snow cover map is wanted."

p.10, l.29 to 32: “However, the detected *NDSI* threshold dependency automatically leads to the question if the need for threshold adaption is also necessary for coarser resolution satellite snow cover maps, for example, for a spatial resolution of 500 m or 1 km.”

p.10, l.23 to 27: “This assumption and the transferability of the model is probably only true for high elevation areas. Even though that the *NDSI* is an index which reduces the dependence on atmospheric conditions, an atmospheric correction might be necessary as well as more dynamic approaches that reflect the vegetation growth and senescence over the year for lowland areas. Hence, the approach needs to be further evaluated and developed in future studies with more test sites.”

**2)** The authors give too much details about the PRACTISE software, which was used to rectify the photographs from the time lapse cameras, whereas it was already described in another journal (for instance Fig. 2 was already published in Härer et al. 2016; Fig. 3 and Fig. 4 further illustrate the PRACTISE workflow and are not useful in my opinion). An important step for this study is rather how these camera snow maps were resampled to the Landsat resolution and it is missing. Indeed, camera snow maps have a submeter ground sampling distance. As a result, it is likely that some Landsat pixels were classified as "snow" from the camera images, while they were actually not 100% snow covered in the camera images.

**Answer to 2)** We were encouraged to extend the details about the PRACTISE software and its application in its study by the editor before the discussion was opened. And we thank the editor now for this recommendation as we see the benefit that users interested in the approach but not in each detail of the algorithm of PRACTISE can easily follow the processing steps needed to calibrate the *NDSI* threshold of a photograph with this description. You are however right that we should add the resampling strategy used for the different spatial resolutions of the georectified photographs (1 and 5m) and of the Landsat satellite image (30 m). Moreover, we added more citations to our earlier publications on PRACTISE to clarify the workflow (see comment1 of the anonymous reviewer). To avoid losing any information, we used the finer resolution for calibration by resampling the Landsat resolution to the photograph resolution. The calibrated *NDSI* threshold is then finally applied to the Landsat pixels at their original resolution of 30m to generate the Landsat snow cover map which indeed will have mixed pixels.

### **Manuscript changes to 2)**

p.6, l.27 to p.7, l4: “The Landsat image was thereby resampled to the finer resolution of the photograph in the calibration to avoid losing any information by the aggregation of the photograph snow cover map. The best agreement between the local scale (photograph) and the large scale (Landsat) snow cover map was detected by maximizing the accuracy which is the ratio of identically classified pixels to the overall number of photograph-satellite image pixel pairs  $n$  (Aronica et al., 2002):

$$F = \frac{(a+d)}{n}, \quad (2)$$

$a$  represents the number of correctly identified snow pixels and  $d$  the same for no snow pixels.  $F$  is between 0 and 1 and becomes 1 for a perfect agreement between the two images.

The calibrated *NDSI* threshold was finally applied to the original Landsat data with 30m pixel size to generate the final Landsat snow cover map.”

**3)** The literature review in the introduction was a bit overlooked. The authors state that "The used snow-cover mapping approaches can be grouped into three categories: manual interpretation, classification-based, and index-based methods" but there are other approaches based on spectral unmixing. The proposed "geology dependent offset" is the result of a well-known phenomena (e.g. Kaufman et al. 2002, GRL), and is similar to the *NDSI\_0* method developed by Chaponnière et al. (2005, IJRS); it can be also seen as an extreme simplification of a spectral mixture analysis used in other MODIS snow products (e.g., Sirguey et al., 2009 RSE; Painter et al., 2009 RSE).

**Answer to 3)** We agree that our literature review in the introduction benefits from the references that you proposed. We thus include them in the revised manuscript.

### **Manuscript changes to 3)**

p.2, l.13 to 19: “The used snow-cover mapping approaches can be grouped into four categories: manual interpretation, classification-based and index-based methods, and spectral mixture analysis. Manual interpretation as well as classification-based approaches are often used in local snow cover mapping studies. Both are out of the scope of this study as a need for expert knowledge and a high time-demand limit their applicability for large time series data. Spectral Mixture Analysis are also not in the focus of this study as they need an extensive spectral database for the different land surface components (Sirguey et al., 2009; Painter et al., 2009). These databases are usually not commonly available and only the final snow cover product can be downloaded (TMSCAG for Landsat and MODSCAG for MODIS).”

p.3, l.23 to 25: “Moreover, we present a seasonal model calibrated with the *NDSI* threshold time series. The quadratic polynomial model can also be locally adapted by including a geology dependent offset which is comparable to earlier findings of Chaponnière et al. (2005).”

**4)** Overlap with Härer et al. (2016 GMD). In a previous paper, the authors already showed the results of the *NDSI* threshold calibration on three Landsat scenes using the same method. Here, the authors extend this approach to a time series of Landsat images, which is a good idea I think. The authors obtain a (weak) seasonal cycle in the calibrated *NDSI* threshold value. Given that an important insight of this TCD paper was already introduced by Härer et al. 2016 ("A spatial and temporal adjustment of *NDSI* thresholds is therefore important to ensure optimum results in the snow cover mapping"), I do not think that the "investigation of the reasons of this effect is beyond this study". The authors could test if the calibrated *NDSI\_tr* is correlated to the solar zenith and azimuth angles. In addition, the authors did not consider the hypothesis that this seasonal cycle may be due to inaccurate snow detection in the camera images. What is the bit depth of the camera images? Snow detection from terrestrial camera imagery is difficult in shaded slopes especially from 8-bits RGB pictures. The reported accuracy (below 5% misclassified pixels from visual inspection) can lead to significant changes in the *NDSI*, which are probably within the range of the calibrated *NDSI* threshold variability? This could

be tested by excluding shaded areas before computing the accuracy of the Landsat snow masks. Another source of error that was not discussed is the one due to the geometric distortion between oblique images and nadir-looking satellite images.

**Answer to 4)** Thank you for this comment. We want to mention here that we used two cameras but only at a single catchment and 3 dates in our case study publication from 2016. We therefore were not sure what the spatial representativity of the calibrated *NDSI* threshold is within the same Landsat scene. Another question additional to the time series analysis that you mention was if we could use a single location for calibration and then use it for this Landsat scene? The study is therefore also completely new as a second catchment within the same Landsat scene is used for testing the spatial representativity within the scene. The systematic offset that was found, analysed and interpreted is thus also a major finding of the publication. Your thoughts on the reasons for variability are the same that we have. We also want to know what is driving the variability. However, this opens a really huge field of options that could be tested (e.g. albedo, snow grain size, snow age, ...) which might need an extended experimental setup and testing all of these options would fill a complete publication on its own. So, it will be a task of our future work. We nevertheless agree that a correlation test for solar zenith and azimuth angles might be helpful here as we see this weak seasonal behaviour. We therefore include it.

The second part of your comment aims at the uncertainty existing in the photograph snow cover maps. You are right, shadows have been a problem when using RGB photography. Therefore, we tackled this issue by developing our method for shadow-affected 8-bit photographs, presented in Härer et al. (2016). We have shown in Härer et al. (2016) that the classifications using this approach has the same quality as the classification using the standard method for sunny photographs without shadows. And we carefully checked all images to ensure that the quality is as high as possible for each photograph. We mention here the highly conservative estimate of 5%. We checked each camera image visually and the value of 5% is the absolute maximum of error that we could think of in one of our classified images (Chapt. 4 in Härer et al., 2013). Usually, the classification error is below 1% if no major classification errors are obvious and thus not an issue. However, we will add these statements for clarification.

#### **Manuscript changes to 4)**

Removed p.10, l1 to l3: "This temporal development is potentially related to the sun angle, snow age, grain size or albedo development or other effects. A detailed investigation of the reasons of this effect is beyond this study but will be subject of future studies."

p.10, l6 to l12: "These results are promising and it needs to be investigated if the seasonal behaviour of the calibrated *NDSI* thresholds can be attributed to the elevation and azimuth angles of the sun. The correlation  $r$  between azimuth angle and *NDSI* is 0.75 for RCZ and 0.42 for VF. For sun elevation,  $r$  is 0.77 for RCZ and 0.54 for VF. The sun angles thus are correlated to the seasonal development but do not fully explain the behaviour. The temporal development is thus potentially also related to snow age, grain size, albedo development or other effects. These might also explain the observed variability

within the seasons. A detailed investigation of this variability is however beyond this study but will be subject of future studies.”

p.4, l4 to 5: “The photographs are recorded as 8-bit data with three colour channels (red, green and blue; RGB) on an hourly basis for RCZ and three times a day for VF.”

p.6, l12 to 18: “The photograph snow cover maps did have even in the case that an insufficient classification algorithm was used for a specific situation less than 5% misclassified pixels in the worst case region of the photograph in Chapt. 4 in Härer et al. (2013). It was also shown that the classification of shadow-affected photographs are of the same quality as sunny photographs (Chapt. 4 in Härer et al., 2016). As for this study, every classified image was visually inspected and no major snow classification errors comparable to our worst case example in the previous publication were found, we expect a relative misclassification error of 1%.”

### Specific comments:

Note: We do not show each of the manuscript changes for the specific comments here as the changes are obvious by the answer. Nonetheless, the changes will be denoted in the new manuscript.

**P1L12:** Earth not earth

**Answer:** Thank you for the correction, we will revise it.

**P3L22:** glacierized not glaciated

**Answer:** You are right, we will change it.

**P3L23-25:** It could be useful to show the spectral profiles of the snow-free substratum (limestone is more reflective in the visible range than gneiss).

**Answer:** We think that adding a figure is a bit too much here as only two bands are interesting for the NDSI, however we will add a paragraph describing the general spectral behaviour of limestone and gneiss with respect to the NDSI calculation in the results and discussion section to explain the different mean NDSI values.

**P4L13:** I do not think that this statement is true "no atmospheric correction is applied (..) the majority of studies that apply the NDSI for snow cover mapping". Many studies use the MOD10 snow products, or TMSCAG for Landsat, which use surface reflectances.

**Answer:** We will rephrase this sentence as there are also many studies that use atmospheric correction. We will clarify this.

**P3L17:** NDSI and NDSI\_thr are written in equation mode, sometimes in plain text.

**Answer:** Thank you, we will change it.

**P4L9:** photographs not photographs. What is the acquisition time of the camera? is it synchronous to Landsat overpass time?

**Answer:** The photographs at RCZ are taken on an hourly basis and at VF in the morning, at noon and in the afternoon and thus the Landsat image is calibrated with a photograph that is recorded within the same hour at RCZ and within three hours at VF. We will add a statement for clarification.

**P4L31:** did you find a difference in the results between Landsat 8 and the Landsat 5/7? Landsat 8 instrument has higher radiometric resolution which improves snow classification in mountains (less saturation, higher SNR in shaded slopes).

**Answer:** We also had this thought at the beginning. However, we would need more acquisitions for this investigation. And the strong variability as described in Table 1 and Figure 7b superimposed on the seasonal threshold behaviour probably hides the signal between different sensor systems.

**P6L8:** Note that this metric is usually referred to as accuracy and may not be a robust performance measure when the number of a class is much greater than the number of the other one.

**Answer:** Thank you, we will use the term 'accuracy'. In general, each performance measure has a weakness. In our case however, both investigated catchments are partially glacierized. A minimum area of snow or ice is thus left in summer. It thus should not be a major problem in our catchments. Moreover, a prerequisite for our calibration method is that there are snow covered areas as well as areas free of snow in the photograph and thus also in the Landsat scene (p.4, l.13).

**P7L29:** if vertical, these rock faces are not visible in images captured by nadir-looking sensors like Landsat 7.

**Answer:** Thank you for bringing up this mistake. We are investigating summer dates here. Low and flat areas are also snow-free in this time of the year, the sentence was deleted.

**P7L31:** "NDSI reflectances" does not make sense

**Answer:** You are right, we will correct this in the complete manuscript.

**P8L10-12:** this sentence is not clear to me.

**Answer:** We will clarify the sentence. The 'uncertainty' term is maybe again inexact. The percentages outline the differences in snow cover between the standard and the calibrated threshold.

**P8L31:** fitted against what? Day of year I think.

**Answer:** Yes, this is true. We will clarify this.

**P9L18:** why not using real MODIS images instead?

**Answer:** We focus on Landsat and the scale of 30m in our study. The aggregation up to 990m is only an experimental setup to outline if the calibration of NDSI thresholds is needed for larger pixel sizes than 30m and we want to analyse different scales here. It is thus not the objective to evaluate a single snow cover product like MOD10/MYD10 which in addition is atmospherically corrected and does not use the 0.4 threshold anymore (see your general comment 1). Moreover, our small catchments are not the best experimental setup for MODIS.

**P9L25:** if I understand well, the resampling to 500m has increased the optimal threshold value. Can you think of an explanation?

**Answer:** Sorry, there is a misunderstanding. We simply say here that the NDSI threshold of 0.4 seems to be a really good estimate at a pixel size of 500m. And the NDSI threshold increases for RCZ and decreases for VF so we do not have any trend here. We add a sentence to underline this.

**Fig. 5:** rainbow colormaps are not recommended (Borland 2007). I am also surprised by the choice of the projection (plate carrée? non-equidistant projections are not recommended for this kind of maps)

**Answer:** These figures are equidistant. It is the standard Matlab output using latitude and longitude in m. We will clarify this by adding the unit and we will also follow your suggestion to adapt the colormap.
